# Supplementary material for: Surface pH modulation of amorphous manganese oxide for enhanced supercapacitor performance
Source: Royal Society of Chemistry journal article supplement (doi:10.1039/d5ta03483c), 2025-01-01
Supplement: d5ta03483c1.pdf [file d5ta03483c1.pdf]

### 1.1 Characterization

X-ray diffraction (XRD) patterns were collected on Aeris (PANalytical) with Cu K $\alpha$  radiation ( $\lambda = 0.154$  nm). Raman spectra were collected on LabRAM HR Evolution (Horiba) with a 532-nm laser device. The zeta potential was collected by Zetasizer Nano (Malvern). X-ray photoelectron spectra (XPS) was acquired on Escalab 250Xi (Thermo Fisher) with a pass energy of 40.0 eV and an energy step of 0.05 eV. The scanning electron microscope (SEM) images were conducted by SU8220 (Hitachi) under 15 kV. The transmission electronic microscopy (TEM) images were captured by Talos F200S (FEI Thermo) under an acceleration voltage of 200 kV.

### 1.2 Electrochemical measurements

After mixing 4 mg of the sample with 200  $\mu$ l of ultrapure water, 750  $\mu$ l of ethyl alcohol, and 50  $\mu$ l of Nafion, the electrode slurry was sonicated for 30 minutes. The slurry was then coated onto a 1 cm<sup>2</sup> carbon paper, with an approximate loading of 2 mg cm<sup>-2</sup> of active material. The solvent was then dried at 60°C to prepare the working electrode. Electrochemical tests were conducted using a CHI 760E electrochemical workstation (Shanghai Chenhua Instrument Co., Ltd., China) in a 1 M Na<sub>2</sub>SO<sub>4</sub> aqueous electrolyte solution, with Ag/AgCl and a carbon rod serving as the reference and counter electrodes, respectively, in a three-electrode system with the sample as the working electrode. Perform cyclic voltammetry (CV) and galvanostatic charge-discharge (GCD) measurements within a potential window of 0.0 to 1.0 V. Utilize the Zahner electrochemical workstation (Germany) for electrochemical impedance spectroscopy (EIS) measurements in the frequency range of 10<sup>-2</sup>-10<sup>5</sup> Hz. The specific mass capacitance (F g<sup>-1</sup>) is determined from CV and GCD curves through (Eq. S1) and (Eq. S2) respectively.

$$C = \frac{\int I \times dV}{vm\Delta V} \quad (\text{Eq. S1})$$

where  $\int I \times dV$  is the area under the curve,  $v$  is the scanning rate,  $m$  is the mass of the active material on the electrode, and  $\Delta V$  is the potential range.

$$C = \frac{I\Delta t}{m\Delta V} \quad (\text{Eq. S2})$$

where  $I$  is the current density,  $\Delta t$  is the discharge time,  $m$  is the mass of the active electrode material, and  $\Delta V$  is the potential range.

A symmetric supercapacitor was fabricated by assembling K-AMO as the working electrode. Two electrodes were separated by glassy fibrous separator in 1 M Na<sub>2</sub>SO<sub>4</sub> aqueous electrolyte. Symmetric supercapacitors were analyzed through cyclic voltammetry (CV) and galvanostatic charge/discharge (GCD) measurements within a potential range of 0.0 to 2.0 V,

utilizing a dual-electrode system on a CHI 760E electrochemical workstation. Button supercapacitor was fabricated by assembling K-AMO as both the anode and cathode. The current collector diameter was 1.2 cm, with an active material loading of 2 mg cm<sup>-2</sup>, and a separator diameter of 1.6 cm. A small amount of electrolyte was added to complete the assembly of the button supercapacitor. The energy density (Wh kg<sup>-1</sup>) and power density (W kg<sup>-1</sup>) of the symmetrical supercapacitor are calculated using equations (Eq. S3) and (Eq. S4):

$$E = \frac{C\Delta V^2}{7.2} \quad (\text{Eq. S3})$$

$$P = \frac{3600E}{t} \quad (\text{Eq. S4})$$

where C is the specific capacitance of the symmetrical supercapacitor,  $\Delta V$  is the measurement potential window, and t is the discharge time.

### 1.3 The in situ ATR-SEIRAS measurements

In situ ATR-SEIRAS testing is performed on a Nicolet iS50 Fourier transform infrared spectrometer. Using a pillar-shaped prism made of silicon crystal as the main ATR component, a layer of gold film is chemically deposited on the surface of the silicon block (Au@Si) as the working electrode for SEIRAS. The electrochemical system consists of a 1 M Na<sub>2</sub>SO<sub>4</sub> aqueous solution, an Ag/AgCl reference electrode, and a carbon rod electrode. In situ ATR-SEIRAS measurements were conducted at room temperature, with the results expressed in absorbance units as  $A = \log (1/T) = -\log (R_s/R_0)$ , where  $R_s$  and  $R_0$  represent the reflected radiation intensity at the selected electrode potential and the open circuit potential (OCP) spectrum, respectively. The CHI 760E electrochemistry workstation (Shanghai Chenhua Co., Ltd., China) was used for potential control.

### 1.4 Calculation of capacitance contributions

The relationships between the scan rate and current density were used to investigate the reaction kinetics based on Eq. S5:

$$i = av^b \quad (\text{Eq. S5})$$

where a and b are constants related to the different electrochemical processes, in which b = 0.5 represents diffusion control while b = 1 belongs to surface control.

To quantify the capacitive contribution to the current response, we could divide the above formula into Eq. S6:

$$i(V) = k_1v + k_2v^{1/2} \quad (\text{Eq. S6})$$

Where i (V) is the current at a certain potential of V, v is the scan rate. k<sub>1</sub> and k<sub>2</sub> correspond

to the capacitive-controlled and diffusion-controlled processes, respectively.

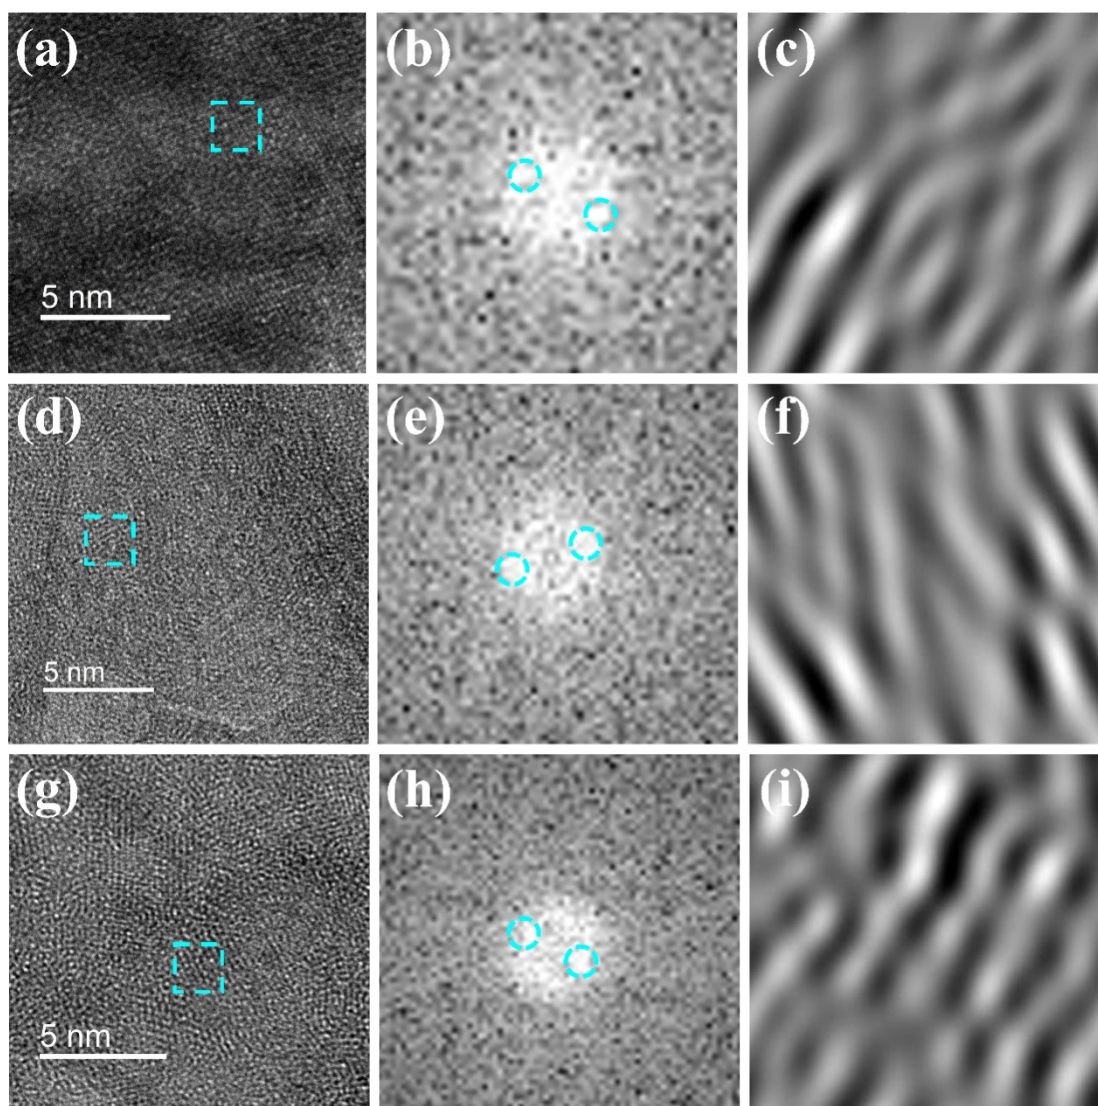

Fig. S1 TEM and Fourier transform images of Na-AMO-OH (a-c), K-AMO-OH (d-f) and Na-AMO (g-i).

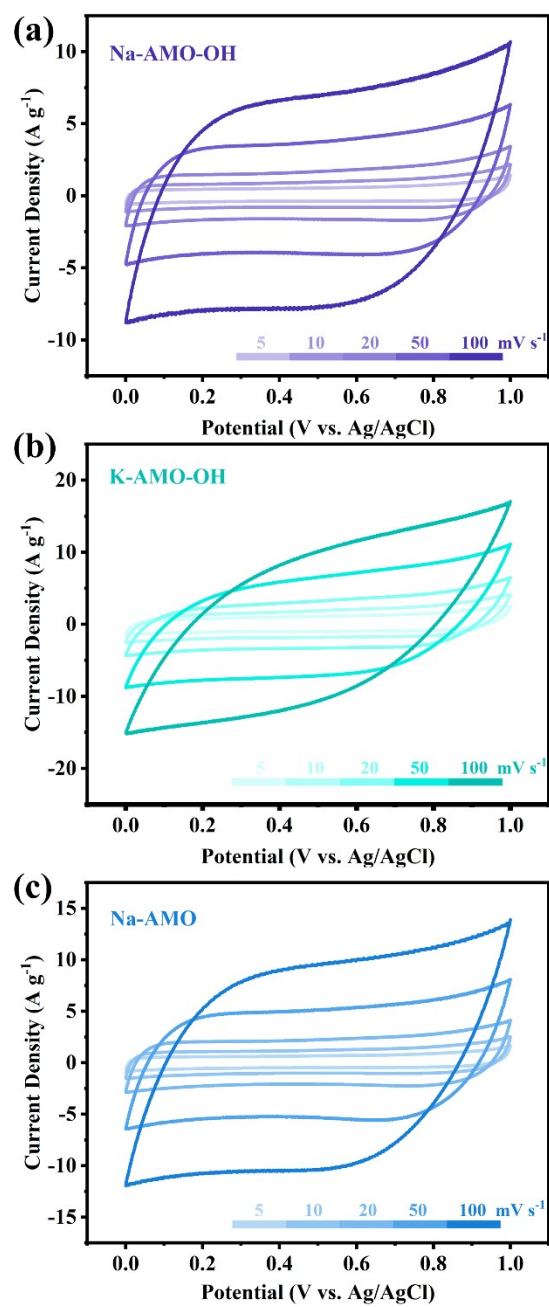

Fig. S2 CV curves of Na-AMO-OH (a), K-AMO-OH (b), and Na-AMO (c) at various scan rates.

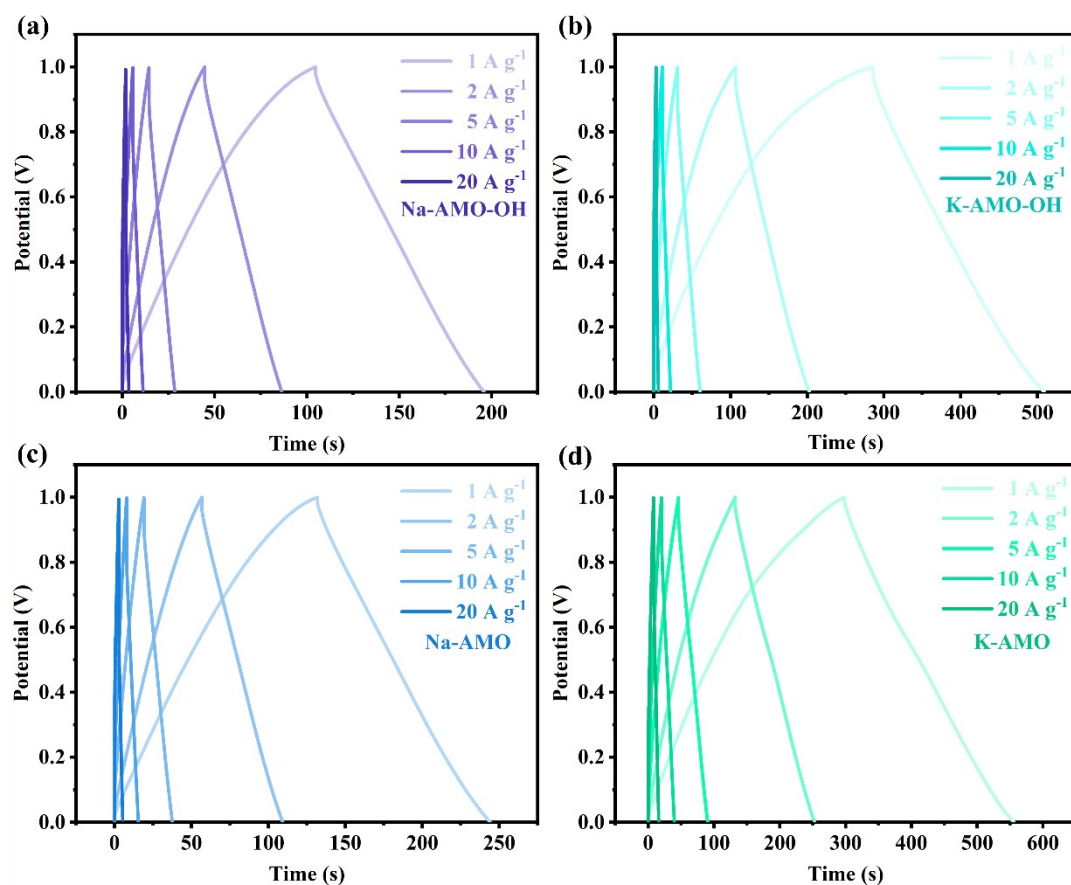

Fig. S3 GCD curves of Na-AMO-OH (a), K-AMO-OH (b), Na-AMO (c), and K-AMO (d) at various current densities.

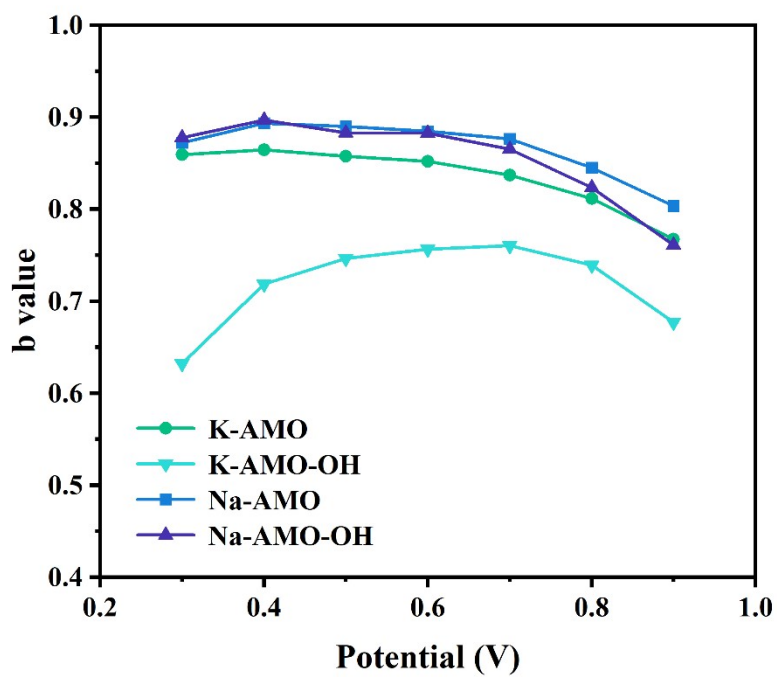

Fig. S4 The b values of four samples at different voltages.

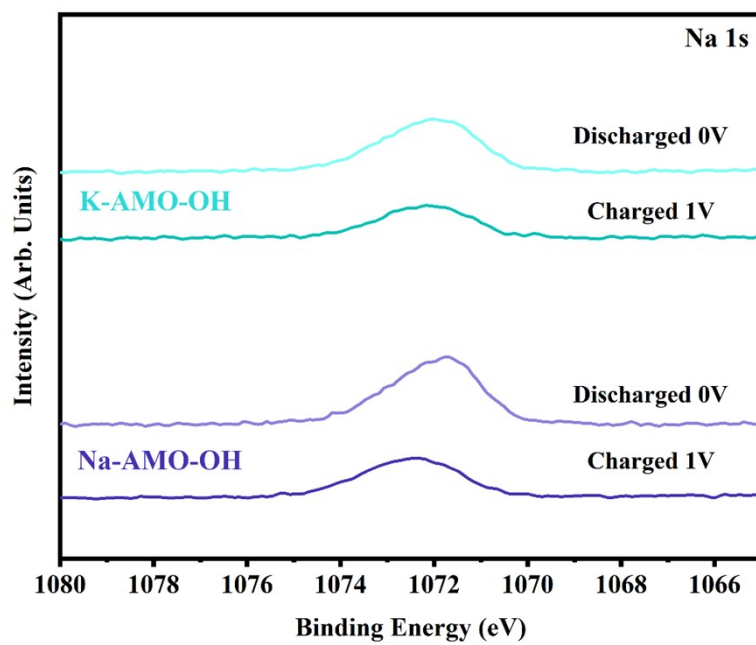

Fig. S5 XPS spectra of Na 1s for K-AMO-OH and Na-AMO-OH samples after charging and discharging.

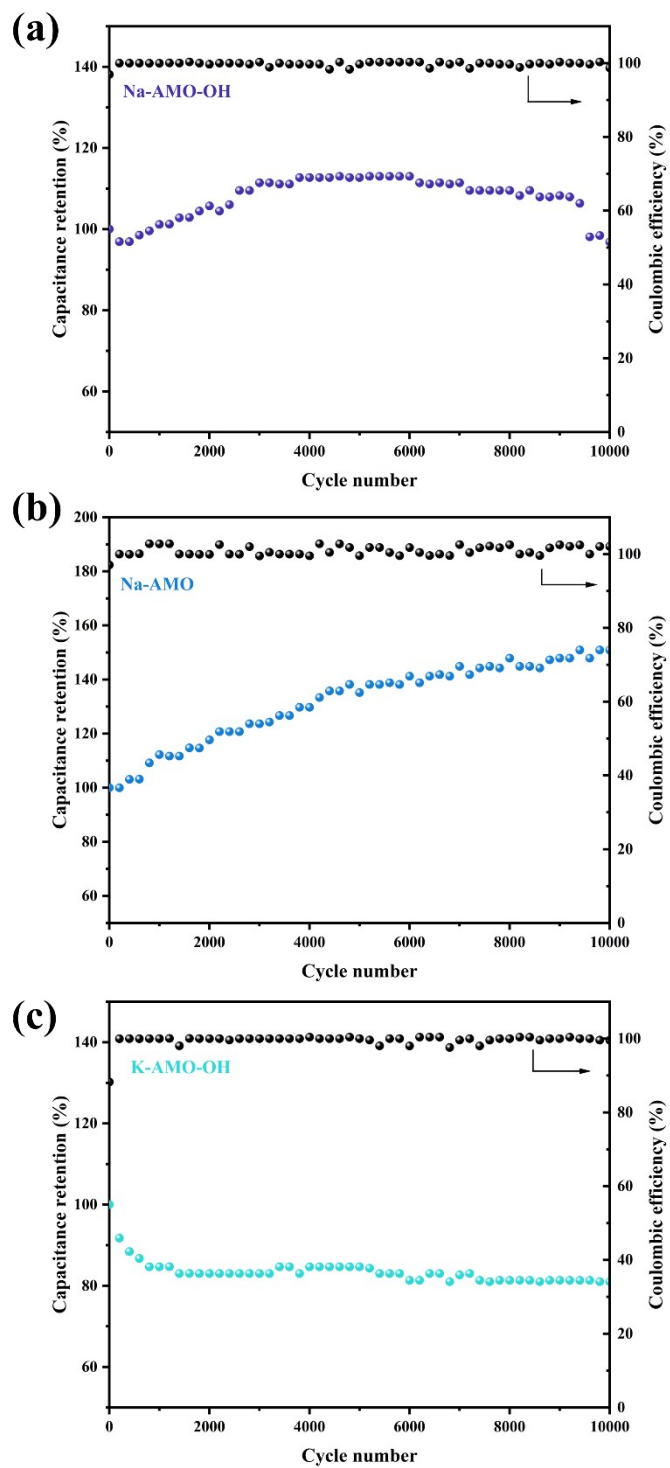

Fig. S6 Cyclic testing graphs of Na-AMO-OH (a), Na-AMO (b), and K-AMO-OH (c) at a current density of  $20 \text{ A g}^{-1}$  for 10 000 charge-discharge cycles.



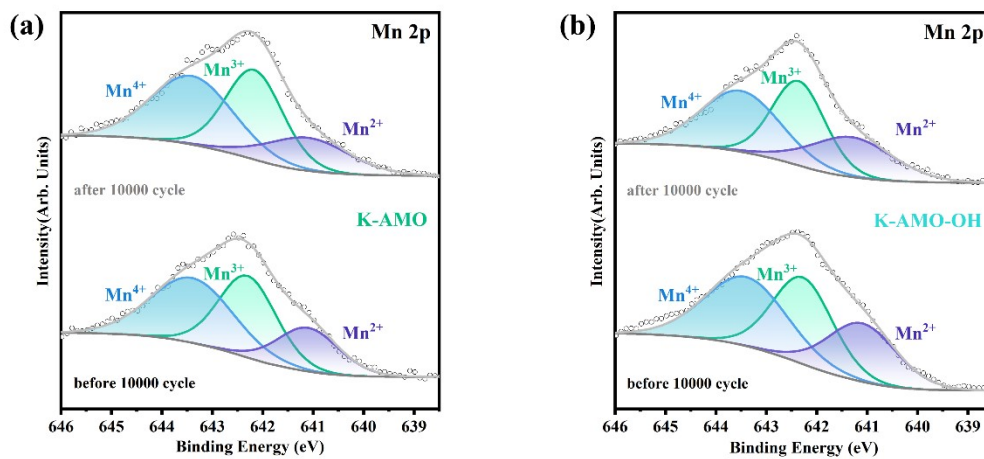

Fig. S7 XPS spectra of Mn 2p for K-AMO (a) and K-AMO-OH (b) after 10 000 cycles of galvanostatic charge-discharge.

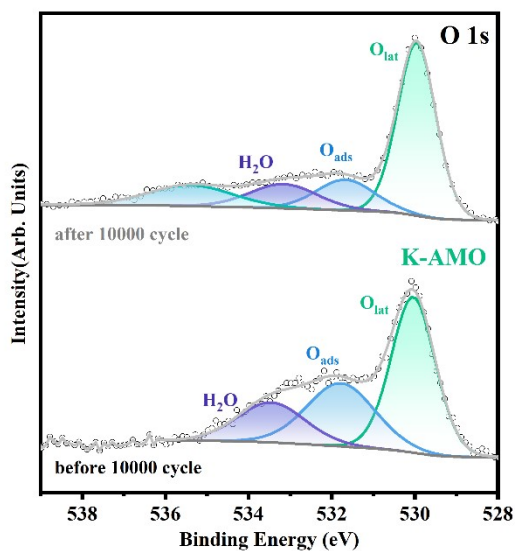

Fig. S8 XPS spectra of O 1s for K-AMO after 10 000 cycles of galvanostatic charge-discharge.

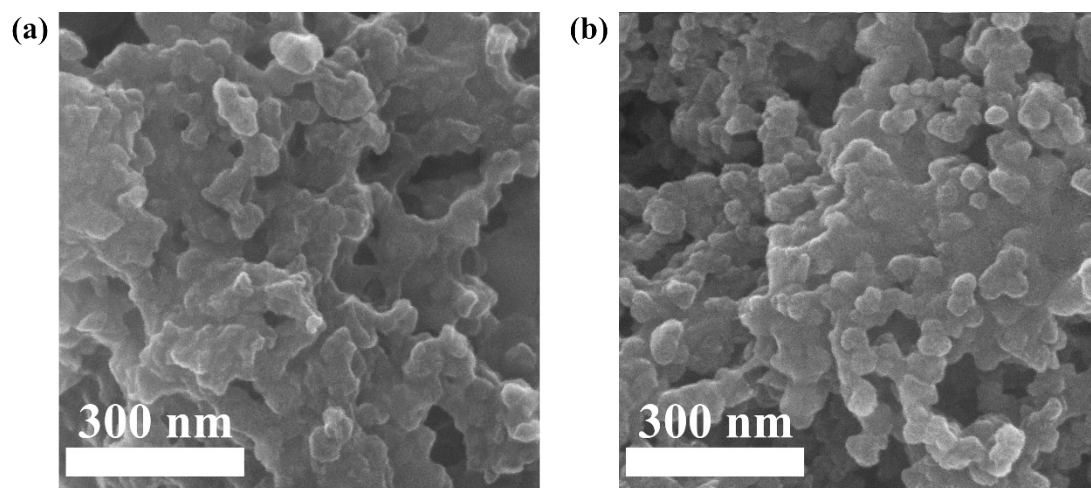

Fig. S9 SEM images for K-AMO (a) and K-AMO-OH (b) after 10 000 cycles of galvanostatic charge-discharge.

Table S1 The specific capacitance calculated by CV at various scan rates.

| Scan<br>rate<br>(mV s <sup>-1</sup> ) | Specific capacitance (F g <sup>-1</sup> ) |        |          |           |
|---------------------------------------|-------------------------------------------|--------|----------|-----------|
|                                       | K-AMO                                     | Na-AMO | K-AMO-OH | Na-AMO-OH |
| 5                                     | 258.88                                    | 123.08 | 214.63   | 99.09     |
| 10                                    | 242.70                                    | 117.03 | 186.98   | 91.60     |
| 20                                    | 225.69                                    | 111.40 | 161.20   | 84.69     |
| 50                                    | 195.78                                    | 100.18 | 126.71   | 74.81     |
| 100                                   | 164.90                                    | 88.13  | 98.90    | 66.46     |

Table S2 The specific capacitance calculated by GCD at various current density.

| Current<br>density<br>(A g <sup>-1</sup> ) | Specific capacitance (F g <sup>-1</sup> ) |        |          |           |
|--------------------------------------------|-------------------------------------------|--------|----------|-----------|
|                                            | K-AMO                                     | Na-AMO | K-AMO-OH | Na-AMO-OH |
| 1                                          | 258.32                                    | 112.57 | 223.84   | 91.40     |
| 2                                          | 242.17                                    | 105.13 | 192.41   | 83.65     |
| 5                                          | 221.88                                    | 92.59  | 148.02   | 70.42     |
| 10                                         | 196.84                                    | 76.69  | 107.63   | 55.65     |
| 20                                         | 158.50                                    | 52.68  | 59.21    | 35.37     |

Table S3 Calculation of Coulombic efficiency in GCD tests at various current densities.

| <b>Current<br/>t<br/>density</b><br><br><b>(A g<sup>-1</sup>)</b> | <b>Columbic efficiencies (%)</b> |               |                 |                  |
|-------------------------------------------------------------------|----------------------------------|---------------|-----------------|------------------|
|                                                                   | <b>K-AMO</b>                     | <b>Na-AMO</b> | <b>K-AMO-OH</b> | <b>Na-AMO-OH</b> |
| 1                                                                 | 87                               | 86            | 78              | 87               |
| 2                                                                 | 92                               | 93            | 90              | 94               |
| 5                                                                 | 96                               | 97            | 95              | 97               |
| 10                                                                | 98                               | 98            | 96              | 98               |
| 20                                                                | 99                               | 98            | 95              | 97               |

Table S4 The calculation results of SSC measured by CV and GCD tests

| <b>Scan rate</b>           | <b>SSC</b>                                     | <b>Current density</b>    | <b>SSC</b>                                     |
|----------------------------|------------------------------------------------|---------------------------|------------------------------------------------|
| <b>(mV s<sup>-1</sup>)</b> | <b>Specific capacitance (F g<sup>-1</sup>)</b> | <b>(A g<sup>-1</sup>)</b> | <b>Specific capacitance (F g<sup>-1</sup>)</b> |
| 5                          | 101.70                                         | 1                         | 101.00                                         |
| 10                         | 92.65                                          | 2                         | 76.87                                          |
| 20                         | 85.67                                          | 5                         | 58.67                                          |
| 50                         | 72.22                                          | 10                        | 46.06                                          |
| 100                        | 61.51                                          | 20                        | 31.22                                          |

Table S5 Electrochemical parameters of SSC.

| Current density      | Discharge time | Discharge capacitance | Energy density         | Power density         |
|----------------------|----------------|-----------------------|------------------------|-----------------------|
| (A g <sup>-1</sup> ) | (s)            | (F g <sup>-1</sup> )  | (Wh kg <sup>-1</sup> ) | (W kg <sup>-1</sup> ) |
| 1                    | 202.00         | 101.00                | 56.11                  | 1000.0                |
| 2                    | 76.85          | 76.87                 | 42.70                  | 2000.6                |
| 5                    | 23.45          | 58.67                 | 32.60                  | 5004.2                |
| 10                   | 9.2            | 46.06                 | 25.59                  | 10012.9               |
| 20                   | 3.1            | 31.22                 | 17.34                  | 20143.6               |

Table S6 EIS test Nyquist diagram fitting results.

| Sample    | R <sub>s</sub> | CPE                  |       | R <sub>ct</sub> | W <sub>o</sub> |      |      |
|-----------|----------------|----------------------|-------|-----------------|----------------|------|------|
|           |                | CPE-T                | CPE-P |                 | W-R            | W-T  | W-P  |
| K-AMO     | 3.24           | $1.6 \times 10^{-2}$ | 0.65  | 0.18            | 2.84           | 0.39 | 0.47 |
| Na-AMO    | 3.40           | $9.4 \times 10^{-3}$ | 0.69  | 0.20            | 1.64           | 0.20 | 0.49 |
| K-AMO-OH  | 3.31           | $2.3 \times 10^{-2}$ | 0.73  | -               | 1.87           | 0.26 | 0.48 |
| Na-AMO-OH | 3.48           | $8.2 \times 10^{-4}$ | 0.97  | 0.21            | 2.20           | 0.38 | 0.47 |

Table S7 The comparison between the specific volume in our work and the report.

| Material                                           | Method                     | Specific capacitance                                | Substrate and electrolyte                                    | Capacitance retention                                | Mass loading             | Ref.      |
|----------------------------------------------------|----------------------------|-----------------------------------------------------|--------------------------------------------------------------|------------------------------------------------------|--------------------------|-----------|
| Amorphous MnO <sub>2</sub> nanospheres             | Chemical precipitation     | 252.2 F g <sup>-1</sup><br>at 1 A g <sup>-1</sup>   | Ni Foam<br>(1 M Na <sub>2</sub> SO <sub>4</sub> )            | 95.1% after 5200 cycles<br>at 5 A g <sup>-1</sup>    | 2 mg cm <sup>-2</sup>    | 1         |
| Na <sub>x</sub> MnO <sub>2</sub>                   | Electrochemical deposition | 230 F g <sup>-1</sup><br>at 1 A g <sup>-1</sup>     | stainless steel<br>(1 M Na <sub>2</sub> SO <sub>4</sub> )    | 64% after 4 cycles<br>at 32 A g <sup>-1</sup>        | -                        | 2         |
| MnO <sub>2</sub>                                   | Chemical precipitation     | 138 F g <sup>-1</sup><br>at 1 A g <sup>-1</sup>     | Carbon cloth<br>(1 M Na <sub>2</sub> SO <sub>4</sub> )       | 82.8% after 10 000 cycles<br>at 1 A g <sup>-1</sup>  | 2 mg cm <sup>-2</sup>    | 3         |
| MnO <sub>2</sub> -CNT                              | Chemical precipitation     | 151.9 F g <sup>-1</sup><br>at 5 mV s <sup>-1</sup>  | Ni Foam<br>(1 M Na <sub>2</sub> SO <sub>4</sub> )            | 92.8% after 5000 cycles<br>at 2 A g <sup>-1</sup>    | 1 mg cm <sup>-2</sup>    | 4         |
| MnO <sub>2</sub> NSs@MnO <sub>2</sub> HNPs         | Electrochemical deposition | 244.5 F g <sup>-1</sup><br>at 0.5 A g <sup>-1</sup> | Carbon cloth<br>(1 M Na <sub>2</sub> SO <sub>4</sub> )       | 120% after 5000 cycles<br>at 1.5 A g <sup>-1</sup>   | 1.3 mg cm <sup>-2</sup>  | 5         |
| α-Fe <sub>2</sub> O <sub>3</sub> /MnO <sub>2</sub> | Hydrothermal method        | 216 F g <sup>-1</sup><br>at 0.5 A g <sup>-1</sup>   | nickel foil sheet<br>(1 M KOH)                               | 85.1% after 10 000 cycles<br>at 1 A g <sup>-1</sup>  | -                        | 6         |
| CNF/MnO <sub>2</sub>                               | DC reactive sputtering     | 151.1 F g <sup>-1</sup><br>at 1 A g <sup>-1</sup>   | Ni Foam<br>(1 M Na <sub>2</sub> SO <sub>4</sub> )            | 93.5% after 1500 cycles<br>at 1 A g <sup>-1</sup>    | -                        | 7         |
| MnO <sub>2</sub> @CNT@CF                           | Electrochemical deposition | 213 F g <sup>-1</sup><br>at 0.1 A g <sup>-1</sup>   | Carbon fabric<br>(0.5 M Na <sub>2</sub> SO <sub>4</sub> )    | 88% after 7000 cycles<br>at 0.5 A g <sup>-1</sup>    | 3.37 mg cm <sup>-2</sup> | 8         |
| MnO <sub>2</sub> @MXene@CC                         | Selective etching          | 234.8 F g <sup>-1</sup><br>at 1 A g <sup>-1</sup>   | Carbon cloth<br>(0.5 M Na <sub>2</sub> SO <sub>4</sub> )     | 80% after 10 000 cycles<br>at 10 A g <sup>-1</sup>   | 0.2 mg cm <sup>-2</sup>  | 9         |
| MnO <sub>x</sub> /CC                               | In-situ electrochemical    | 205.1 F g <sup>-1</sup><br>at 1 mA cm <sup>-2</sup> | Carbon cloth<br>(0.5 M Na <sub>2</sub> SO <sub>4</sub> )     | 91.2% after 5000 cycles<br>at 10 mA cm <sup>-2</sup> | -                        | 10        |
| K-AMO                                              | Chemical precipitation     | 258.3 F g <sup>-1</sup><br>at 1 A g <sup>-1</sup>   | Carbon fiber paper<br>(1 M Na <sub>2</sub> SO <sub>4</sub> ) | 104% after 10 000 cycles<br>at 20A g <sup>-1</sup>   | 2 mg cm <sup>-2</sup>    | This work |

## References

1. Q. Ma, M. Yang, X. Xia, H. Chen, L. Yang and H. Liu, *Electrochim. Acta*, 2018, 291, 9-17.
2. M. A. Desai, A. Kulkarni, G. Gund and S. D. Sartale, *Energy Fuels*, 2021, **35**, 4577-4586.
3. A. Zhang, R. Zhao, L. Hu, R. Yang, S. Yao, S. Wang, Z. Yang and Y. M. Yan, *Adv. Energy Mater.*, 2021, **11**.
4. H. Huang, W. Zhang, Y. Fu and X. Wang, *Electrochim. Acta*, 2015, **152**, 480-488.
5. G. Nagaraju, Y. H. Ko, S. M. Cha, S. H. Im and J. S. Yu, *Nano Res.*, 2016, **9**, 1507-1522.
6. M. Racik K, A. Manikandan, M. Mahendiran, J. Madhavan, M. Victor Antony Raj, M. G. Mohamed and T. Maiyalagan, *Ceram. Int.*, 2020, **46**, 6222-6233.
7. P. Ning, X. Duan, X. Ju, X. Lin, X. Tong, X. Pan, T. Wang and Q. Li, *Electrochim. Acta*, 2016, **210**, 754-761.
8. M. Nepal, G. S. Gudavalli and T. P. Dhakal, *ACS Omega*, 2025, **10**, 3439-3448.
9. M. Huang, J. He, Y. Yang, X. Zhang, C. Liang, Y. Lv, D. He and Y. Wang, *J. Phys. Chem. Solids*, 2026, **208**.
10. X. Wu, T. Zhan, S. Sun, W. Chen, A. Yu, S. Qiu, L. Chen, D. Qu, J. Duan and X. Li, *Electrochim. Acta*, 2025, **516**.
